# Supplementary material
Source: publisher figshare collection journal article supplement (https://rs.figshare.com/ndownloader/files/12770603)
Supplement: Supplementary file 1 [file 12770603]

Supplementary Table 1. Details of primers used for RT-PCR.

| Gene | Primer Sequence | Accession No. |
| --- | --- | --- |
| *ba* | 5’TGTTACCCACACTGTGCCCATCTA 3’  5’TTCATGAGGTAGTCCGTCAGGTCA 3’ | KC874663.1 |
| *hprt1* | 5’ CCTCATCAACCCAGAACTGAAA 3’  5’ GGTGCAACTATCCATTAATCACAATC 3’ | MF581006 |
| *ppia* | 5’ CACTGGAGGCAAATCCATCTAT 3’  5’ ACTGAGAACCGTTCGTATTGG 3’ | MF427848 |
| *dio2* | 5’ CAAGTGTGGAACCAAATGCCACCT 3’  5’ TAGCTGAGCCAAAGTTGACCACCA 3’ | KJ624635 |
| *dio3* | 5’ CGTGGACACCATGGACAATGCTT 3’  5’ TCACCTTCTCCTCCTGGATGATGT 3’ | KJ624636 |
| *per2* | 5’CTCTGCTGTGTGTTGCTTGCAGAA 3’  5’ ACAGGTCGGTGTGTGTGTAGTTGT 3’ | KC874657 |
| *cry1* | 5’ AGCTGGGTTTTGACACAGATGG 3’  5’ GTTGGCTACCCAAGCCTTTCG 3’ | KC874658.1 |
| *th* | 5'- GATCGTTGAGCTGGAATACTT -3'  5'- CACATCTTCTGCTACCCTCTTG -3' | KM272254.1 |
| *adcyap1* | 5’ ACATAGACGGCATCTTCACG 3’  5’ CAGGACGGCTGCTAAGTATTTC 3’ | MF427847 |
| *dnmt3a* | 5’ ACCAGGGCAAGATCATGTA 3’  5’ CCAATGACCAGATCAAAGGG 3’ | MF581007 |
| *dnmt3b* | 5’ CCTTCCACCCACTGTTCAA 3’  5’ CTGGTACCCATCTTCGTCATAC 3’ | MF581004 |
| *tet2* | 5’ CCACGTGCTCCCATTATAC 3’  5’ CTGCCATTCCTCTTCTTCTC 3’ | MF581005 |
